# Supplementary material for: In Vivo Virulence Characterization of Pregnancy-Associated Listeria monocytogenes Infections
Source: PubMed Central journal article supplement (PMC6204711; doi:10.1128/iai.00397-18), 2018-10-25

## Supplementary Information:

### Table S1. Strains used in this study.

<sup>1</sup>Strain ID designated by outside laboratory

<sup>1</sup>Date received at CDC

<sup>3</sup>State where isolate was originally acquired

<sup>4</sup>As determined at CDC

<sup>5</sup>strain number used in this study

<sup>6</sup>Shading indicates significant z-scores. Red, z-score >2.0. Green, z-score <-2.0

n/a, not applicable

nd, not determined

### Table S2. Comparison of splenic virulence scores between mouse and guinea pig.

### Supplementary Figure S1.

#### Fig. S1. Quantification of the founding population in spleens and placentas of guinea pigs.

Pregnant Hartley guinea pigs (spleens n = 3; placentas n = 11) were infected i.v. with pools containing differentially-tagged in the same 10403S strain. The founding population (Nb) was calculated by the harmonic mean of the tag abundance based in the organ. A Mann-Whitney test of the the founding populations in spleens and placentas found a statistically significant difference (\*\**P*-value = 0.0055). Filled circles represent the amount of bacteria that founded the infection of the organ in CFU/mL and red bars represent the median.

### **Supplemental method for estimating the founding population in each organ:**

Abundance of the signature tagged bacteria was determined by using qPCR and CFU/organ data. For each signature tag in each organ, the amount of DNA in ng was calculated by a standard curve using the  $C_p$  values and known ng amounts. The frequency of abundance of signature tags was determined by dividing the calculated ng of DNA for each tag over the summed total ng for all signature tags in a given organ. The frequencies were then multiplied by the amount of CFU/organ at the time of dissection. Finally, the harmonic mean was calculated for each organ to find the effective population.

Table S1

| Strain ID <sup>1</sup> | Date Received <sup>2</sup> | State <sup>3</sup> | Specimen Source  | Serotype <sup>4</sup> | Signature Tag | Pool Number | Strain Source                                             | # for this study <sup>5</sup> | Mouse spleen RA (wt-normalized) | GP spleen RA (wt-normalized) | GP placenta RA (wt-normalized) | Z-score mouse spleen <sup>6</sup> | Z-score GP spleen <sup>6</sup> | Z-score placenta <sup>6</sup> |       |
|------------------------|----------------------------|--------------------|------------------|-----------------------|---------------|-------------|-----------------------------------------------------------|-------------------------------|---------------------------------|------------------------------|--------------------------------|-----------------------------------|--------------------------------|-------------------------------|-------|
| 10403S-Erm-116         | n/a                        | n/a                | n/a              | 1/2a                  | 116           | n/a         | D. Portnoy (10403S/erm strain, this work)                 | n/a                           | n/a                             | n/a                          | n/a                            | n/a                               | n/a                            | n/a                           |       |
| 10403S-116             | n/a                        | n/a                | n/a              | 1/2a                  | 116           | 1-9         | Mellon-Witt et al. 2012                                   | 81-89                         | 1.044                           | 0.993                        | 0.905                          | n/a                               | n/a                            | n/a                           |       |
| 10403S-119             | n/a                        | n/a                | n/a              | 1/2a                  | 119           | 2           | Mellon-Witt et al. 2012                                   | 98                            | 0.859                           | 1.005                        | 1.142                          | n/a                               | n/a                            | n/a                           |       |
| 10403S-191             | n/a                        | n/a                | n/a              | 1/2a                  | 191           | 5           | Mellon-Witt et al. 2012                                   | 90                            | 1.043                           | 0.961                        | 1.172                          | n/a                               | n/a                            | n/a                           |       |
| 10403S-205             | n/a                        | n/a                | n/a              | 1/2a                  | 205           | 8           | Mellon-Witt et al. 2012                                   | 96                            | 0.929                           | 1.035                        | 1.193                          | n/a                               | n/a                            | n/a                           |       |
| 10403S-210             | n/a                        | n/a                | n/a              | 1/2a                  | 210           | 7           | Mellon-Witt et al. 2012                                   | 97                            | 1.031                           | 1.056                        | 1.171                          | n/a                               | n/a                            | n/a                           |       |
| 10403S-219             | n/a                        | n/a                | n/a              | 1/2a                  | 219           | 1           | Mellon-Witt et al. 2012                                   | 91                            | 0.923                           | 0.991                        | 1.072                          | n/a                               | n/a                            | n/a                           |       |
| 10403S-234             | n/a                        | n/a                | n/a              | 1/2a                  | 234           | 6           | Mellon-Witt et al. 2012                                   | 95                            | 1.025                           | 1.022                        | 1.095                          | n/a                               | n/a                            | n/a                           |       |
| 10403S-242             | n/a                        | n/a                | n/a              | 1/2a                  | 242           | 3           | Mellon-Witt et al. 2012                                   | 93                            | 0.831                           | 0.887                        | 0.892                          | n/a                               | n/a                            | n/a                           |       |
| 10403S-288             | n/a                        | n/a                | n/a              | 1/2a                  | 288           | 4           | Mellon-Witt et al. 2012                                   | 92                            | 0.890                           | 1.066                        | 0.703                          | n/a                               | n/a                            | n/a                           |       |
| 10403S-296             | n/a                        | n/a                | n/a              | 1/2a                  | 296           | 9           | Mellon-Witt et al. 2012                                   | 98                            | 1.087                           | 1.038                        | 1.113                          | n/a                               | n/a                            | n/a                           |       |
| 10403S-116             | n/a                        | n/a                | n/a              | 1/2a                  | 116           | 10          | Mellon-Witt et al. 2012                                   | 81-89                         | 1.126                           | 1.064                        | 0.948                          | n/a                               | n/a                            | n/a                           |       |
| 10403S-119             | n/a                        | n/a                | n/a              | 1/2a                  | 119           | 10          | Mellon-Witt et al. 2012                                   | 94                            | 1.010                           | 1.082                        | 0.818                          | n/a                               | n/a                            | n/a                           |       |
| 10403S-191             | n/a                        | n/a                | n/a              | 1/2a                  | 191           | 10          | Mellon-Witt et al. 2012                                   | 90                            | 0.872                           | 0.887                        | 1.318                          | n/a                               | n/a                            | n/a                           |       |
| 10403S-205             | n/a                        | n/a                | n/a              | 1/2a                  | 205           | 10          | Mellon-Witt et al. 2012                                   | 96                            | 0.951                           | 1.019                        | 1.219                          | n/a                               | n/a                            | n/a                           |       |
| 10403S-210             | n/a                        | n/a                | n/a              | 1/2a                  | 210           | 10          | Mellon-Witt et al. 2012                                   | 97                            | 1.055                           | 1.194                        | 1.302                          | n/a                               | n/a                            | n/a                           |       |
| 10403S-219             | n/a                        | n/a                | n/a              | 1/2a                  | 219           | 10          | Mellon-Witt et al. 2012                                   | 91                            | 0.879                           | 0.929                        | 1.200                          | n/a                               | n/a                            | n/a                           |       |
| 10403S-231             | n/a                        | n/a                | n/a              | 1/2a                  | 231           | 10          | Mellon-Witt et al. 2012                                   | 99                            | 0.984                           | 1.196                        | 0.990                          | n/a                               | n/a                            | n/a                           |       |
| 10403S-234             | n/a                        | n/a                | n/a              | 1/2a                  | 234           | 10          | Mellon-Witt et al. 2012                                   | 95                            | 1.092                           | 0.814                        | 0.758                          | n/a                               | n/a                            | n/a                           |       |
| 10403S-242             | n/a                        | n/a                | n/a              | 1/2a                  | 242           | 10          | Mellon-Witt et al. 2012                                   | 93                            | 0.863                           | 1.560                        | 1.119                          | n/a                               | n/a                            | n/a                           |       |
| 10403S-288             | n/a                        | n/a                | n/a              | 1/2a                  | 288           | 10          | Mellon-Witt et al. 2012                                   | 92                            | 1.132                           | 0.950                        | 0.454                          | n/a                               | n/a                            | n/a                           |       |
| 10403S-296             | n/a                        | n/a                | n/a              | 1/2a                  | 296           | 10          | Mellon-Witt et al. 2012                                   | 98                            | 1.026                           | 0.652                        | 1.276                          | n/a                               | n/a                            | n/a                           |       |
| 2009L1022              | 1/22/09                    | IL                 | Placenta         | 1/2a                  | 119           | 6           | CDC and this work                                         | 1                             | 2.593                           | 2.834                        | 2.063                          |                                   |                                | 2.950                         |       |
| 2009L1038              | 2/4/09                     | GA                 | Placenta         | 4b                    | 191           | 6           | CDC and this work                                         | 2                             | 1.335                           | 0.482                        | 0.394                          |                                   |                                | -0.650                        |       |
| 2009L1063              | 2/12/09                    | NY                 | Placenta         | 4b                    | 205           | 6           | CDC and this work                                         | 3                             | 2.049                           | 0.979                        | 1.564                          |                                   |                                | 1.479                         |       |
| 2009L1088              | 3/11/09                    | GA                 | Placenta         | 4b                    | 210           | 6           | CDC and this work                                         | 4                             | 0.933                           | 0.150                        | 0.187                          |                                   |                                | -2.578                        |       |
| 2009L1156              | 5/19/09                    | OR                 | Placenta         | 1/2b                  | 219           | 6           | CDC and this work                                         | 80                            | 0.724                           | 0.547                        | 1.162                          |                                   |                                | -0.267                        |       |
| 2009L1343              | 8/3/09                     | MA                 | Placenta         | 4b                    | 231           | 6           | CDC and this work                                         | 5                             | 2.431                           | 2.076                        | 2.188                          |                                   |                                | 3.317                         |       |
| 2009L1470              | 10/09/09                   | MA                 | Placenta         | 1/2c                  | 242           | 6           | CDC and this work                                         | 6                             | 1.216                           | 0.213                        | 0.915                          |                                   |                                | -0.434                        |       |
| 2009L1496              | 10/21/09                   | MD                 | Placenta         | 4b                    | 288           | 6           | CDC and this work                                         | 7                             | 1.500                           | 1.251                        | 1.979                          |                                   |                                | 2.702                         |       |
| 2009L1554              | 11/10/09                   | NJ                 | Placenta         | 1/2b                  | 236           | 6           | CDC and this work                                         | 8                             | 1.028                           | 0.815                        | 1.178                          |                                   |                                | 0.241                         |       |
| 2009L1586              | 12/4/09                    | AJ                 | Placenta         | 4b                    | 119           | 7           | CDC and this work                                         | 9                             | 1.698                           | 1.874                        | 1.292                          |                                   |                                | 0.874                         |       |
| 2010L-1640             | 1/15/10                    | NJ                 | Placenta         | 1/2b                  | 191           | 7           | CDC and this work                                         | 10                            | 1.099                           | 0.641                        | 0.976                          |                                   |                                | -0.257                        |       |
| 2010L-1666             | 1/29/10                    | NY                 | Placenta         | 1/2b                  | 205           | 7           | CDC and this work                                         | 11                            | 0.936                           | 0.675                        | 1.031                          |                                   |                                | -0.096                        |       |
| 2010L-1831             | 5/11/10                    | VA                 | Placenta         | 4b                    | 219           | 7           | CDC and this work                                         | 12                            | 0.807                           | 0.364                        | 0.645                          |                                   |                                | -1.229                        |       |
| 2010L-1846             | 5/16/10                    | LA                 | Blood (maternal) | 1/2a                  | 234           | 3           | Hog Head Cheese outbreak, MMWR 8 Apr 2011                 | 13                            | 2.523                           | 2.327                        | 1.911                          |                                   |                                | 2.483                         |       |
| 2010L-1876             | 6/11/10                    | CT                 | Placenta         | 1/2b                  | 231           | 7           | CDC and this work                                         | 14                            | 0.846                           | 0.445                        | 1.036                          |                                   |                                | -0.079                        |       |
| 2010L-1961             | 7/22/10                    | OH                 | Placenta         | 4b                    | 234           | 7           | CDC and this work                                         | 15                            | 2.558                           | 3.078                        | 2.008                          |                                   |                                | 2.780                         |       |
| 2010L-1991             | 8/4/10                     | TX                 | Placenta         | 4b                    | 242           | 7           | CDC and this work                                         | 16                            | 1.062                           | 0.181                        | 0.154                          |                                   |                                | -2.162                        |       |
| 2010L-2099             | 9/9/10                     | IL                 | Placenta         | 4b                    | 288           | 7           | CDC and this work                                         | 17                            | 1.951                           | 0.157                        | 0.101                          |                                   |                                | -0.858                        |       |
| 2010L-2141             | 9/27/10                    | TX                 | Placenta         | 4b                    | 296           | 7           | CDC and this work                                         | 18                            | 2.852                           | 2.825                        | 1.815                          |                                   |                                | 2.212                         |       |
| 2010L-2201             | 11/3/10                    | OK                 | Placenta         | 4b                    | 119           | 8           | CDC and this work                                         | 19                            | 0.216                           | 1.088                        | 0.228                          |                                   |                                | -2.459                        |       |
| 2010L-2248             | 11/19/10                   | NY                 | Placenta         | 4b                    | 191           | 8           | CDC and this work                                         | 20                            | 1.371                           | 0.628                        | 1.756                          |                                   |                                | 2.468                         |       |
| H15327                 | n/a                        | n/a                | Peripheral blood | nd                    | 119           | 8           | Memorial Sloan-Kettering Cancer Center                    | 69                            | 2.222                           | 1.554                        | 0.981                          |                                   |                                | -0.240                        |       |
| J0212                  | 12/29/00                   | NC                 | Placenta         | 4b                    | 210           | 1           | NC cheese outbreak, MacDonald et al. 2005                 | 21                            | 1.129                           | 0.888                        | 0.788                          |                                   |                                | -0.878                        |       |
| J1705                  | 9/5/02                     | PA                 | Blood (neonatal) | 4b                    | 219           | 2           | Turkey deli meat outbreak, Gottlieb et al. CID 2006 42:29 | 22                            | 1.701                           | 0.417                        | 1.828                          |                                   |                                | 2.353                         |       |
| J1760                  | 9/2/02                     | NJ                 | Placenta         | 4b                    | 231           | 4           | Turkey deli meat outbreak, Gottlieb et al. CID 2006 42:29 | 23                            | 1.101                           | 0.370                        | 0.529                          |                                   |                                | -1.073                        |       |
| J2685                  | 2/13/04                    | NY                 | Placenta         | 4b                    | 119           | 1           | CDC and this work                                         | 77                            | 0.789                           | 0.128                        | 0.356                          |                                   |                                | -0.581                        |       |
| J3006                  | 8/11/04                    | TX                 | Placenta         | 4b                    | 191           | 1           | CDC and this work                                         | 24                            | 1.740                           | 0.794                        | 0.899                          |                                   |                                | -0.481                        |       |
| J3041                  | 9/8/04                     | CA                 | Placenta         | 1/2a                  | 205           | 1           | CDC and this work                                         | 25                            | 2.668                           | 2.420                        | 1.480                          |                                   |                                | 1.230                         |       |
| J3112                  | 10/12/04                   | NC                 | Placenta         | 4b                    | 210           | 3           | CDC and this work                                         | 26                            | 1.070                           | 2.579                        | 1.458                          |                                   |                                | 1.163                         |       |
| J3215                  | 12/21/04                   | NJ                 | Placenta         | 4b                    | 219           | 9           | CDC and this work                                         | 27                            | 1.276                           | 0.953                        | 0.906                          |                                   |                                | -0.461                        |       |
| J3245                  | 1/7/05                     | NY                 | Placenta         | 4b                    | 231           | 1           | CDC and this work                                         | 28                            | 1.523                           | 1.799                        | 0.999                          |                                   |                                | -0.189                        |       |
| J3246                  | 1/7/05                     | NY                 | Placenta         | 4b                    | 234           | 1           | CDC and this work                                         | 29                            | 1.121                           | 1.480                        | 1.063                          |                                   |                                | 0.000                         |       |
| J3267                  | 2/18/05                    | OH                 | Placenta         | 4b                    | 242           | 1           | CDC and this work                                         | 30                            | 1.450                           | 0.507                        | 0.748                          |                                   |                                | -0.326                        |       |
| J3306                  | 2/10/05                    | NY                 | Placenta         | 4b                    | 288           | 1           | CDC and this work                                         | 31                            | 1.925                           | 1.943                        | 0.977                          |                                   |                                | -0.251                        |       |
| J3316                  | 2/10/05                    | WI                 | Placenta         | 4b                    | 296           | 1           | CDC and this work                                         | 32                            | 1.005                           | 0.967                        | 0.938                          |                                   |                                | -0.366                        |       |
| J3552                  | 8/5/05                     | NC                 | Placenta         | 4b                    | 191           | 2           | CDC and this work                                         | 33                            | 0.776                           | 0.176                        | 0.336                          |                                   |                                | -2.140                        |       |
| J3558                  | 8/11/05                    | GA                 | Placenta         | 4b                    | 205           | 2           | CDC and this work                                         | 34                            | 0.759                           | 0.166                        | 0.528                          |                                   |                                | -1.256                        |       |
| J3668                  | 9/23/05                    | NJ                 | Placenta         | 1/2a                  | 210           | 2           | CDC and this work                                         | 34                            | 3.232                           | 2.031                        | 1.431                          |                                   |                                | 1.085                         |       |
| J3832                  | 12/8/05                    | PA                 | Placenta         | 4b                    | 35            | 219         | 8                                                         | CDC and this work             | 35                              | 0.922                        | 0.931                          | 1.481                             |                                |                               | 1.231 |
| J3854                  | 12/22/05                   | OH                 | Placenta         | 4b                    | 231           | 2           | CDC and this work                                         | 36                            | 2.541                           | 0.897                        | 1.720                          |                                   |                                | 1.936                         |       |
| J3924                  | 3/22/06                    | CT                 | Placenta         | 4b                    | 234           | 2           | CDC and this work                                         | 37                            | 0.807                           | 0.184                        | 0.496                          |                                   |                                | -1.867                        |       |
| J3975                  | 5/12/06                    | CO                 | Placenta         | 1/2b                  | 242           | 2           | CDC and this work                                         | 38                            | 1.538                           | 1.209                        | 1.225                          |                                   |                                | 0.476                         |       |
| J4027                  | 7/17/06                    | IL                 | Placenta         | 4b                    | 288           | 2           | CDC and this work                                         | 39                            | 0.500                           | 0.205                        | 0.406                          |                                   |                                | -1.783                        |       |
| J4040                  | 7/25/06                    | MO                 | Placenta         | 4b                    | 296           | 2           | CDC and this work                                         | 40                            | 2.285                           | 1.543                        | 1.863                          |                                   |                                | 2.395                         |       |
| J4080                  | 8/17/06                    | CT                 | Placenta         | 1/2b                  | 119           | 3           | CDC and this work                                         | 41                            | 1.062                           | 0.462                        | 0.710                          |                                   |                                | -1.037                        |       |
| J4163                  | 9/14/06                    | NH                 | Placenta         | 4c                    | 191           | 3           | CDC and this work                                         | 42                            | 1.793                           | 0.764                        | 0.905                          |                                   |                                | -1.642                        |       |
| J4456                  | 4/6/07                     | TX                 | Placenta         | 4b                    | 205           | 3           | CDC and this work                                         | 43                            | 1.247                           | 1.338                        | 1.913                          |                                   |                                | 2.505                         |       |
| J4461                  | 4/12/07                    | GA                 | Placenta         | 4b                    | 210           | 3           | CDC and this work                                         | 44                            | 1.601                           | 1.802                        | 2.530                          |                                   |                                | 4.320                         |       |
| J4551                  | 6/21/07                    | CT                 | Placenta         | 4b                    | 219           | 3           | CDC and this work                                         | 45                            | 1.467                           | 0.516                        | 0.923                          |                                   |                                | -0.411                        |       |
| J4572                  | 7/17/07                    | GA                 | Placenta         | 1/2a                  | 231           | 4           | CDC and this work                                         | 46                            | 3.985                           | 3.905                        | 2.488                          |                                   |                                | 4.188                         |       |
| J4612                  | 7/31/07                    | AZ                 | Placenta         | 4b                    | 234           | 3           | CDC and this work                                         | 47                            | 1.150                           | 1.493                        | 1.448                          |                                   |                                | 1.127                         |       |
| J4700                  | 8/15/07                    | NY                 | Placenta         | 1/2a                  | 242           | 8           | CDC and this work                                         | 79                            | 2.986                           | 4.582                        | 0.663                          |                                   |                                | -1.177                        |       |
| J4707                  | 8/21/07                    | NY                 | Placenta         | 4b                    | 288           | 3           | CDC and this work                                         | 48                            | 1.436                           | 1.012                        | 0.886                          |                                   |                                | -0.819                        |       |
| J4708                  | 8/21/07                    | NY                 | Placenta         | 4b                    | 296           | 3           | CDC and this work                                         | 49                            | 1.492                           | 0.966                        | 1.065                          |                                   |                                | 0.008                         |       |
| J4834                  | 11/5/07                    | GA                 | Placenta         | 4b                    | 119           | 4           | CDC and this work                                         | 50                            | 1.968                           | 2.249                        | 1.391                          |                                   |                                | 0.966                         |       |
| J4894                  | 12/6/07                    | TX                 | Placenta         | 4b                    | 191           | 4           | CDC and this work                                         | 51                            | 0.329                           | 0.316                        | 0.546                          |                                   |                                | -1.520                        |       |
| J4897                  | 12/11/07                   | DE                 | Placenta         | 1/2b                  | 205           | 4           | CDC and this work                                         | 52                            | 0.948                           | 0.811                        | 0.899                          |                                   |                                | -0.482                        |       |
| J4903                  | 12/13/07                   | MI                 | Placenta         | 4b                    | 210           | 4           | CDC and this work                                         | 53                            | 1.450                           | 0.507                        | 0.748                          |                                   |                                | -1.338                        |       |
| J4910                  | 12/19/07                   | NC                 | Placenta         | 4b                    | 219           | 4           | CDC and this work                                         | 54                            | 0.279                           | 0.219                        | 0.323                          |                                   |                                | -2.471                        |       |
| J4969                  | 1/31/08                    | TX                 | Placenta         | 4c                    | 231           | 8           | CDC and this work                                         | 55                            | 0.857                           | 0.121                        | 0.132                          |                                   |                                | -2.740                        |       |
| J4970                  | 1/31/08                    | TX                 | Placenta         | 4b                    | 234           | 4</         |                                                           |                               |                                 |                              |                                |                                   |                                |                               |       |

Table S2

| <div style="text-align: right; padding-right: 5px;">Guinea Pig</div> <div style="text-align: left; padding-left: 5px;">Mouse</div> | hypervirulent | hypovirulent | neutral |
|------------------------------------------------------------------------------------------------------------------------------------|---------------|--------------|---------|
| hypervirulent                                                                                                                      | 19            | 1            | 7       |
| hypovirulent                                                                                                                       | 0             | 13           | 5       |
| neutral                                                                                                                            | 4             | 6            | 22      |

# Founder population size in pregnant guinea pig

## All strains 10403S

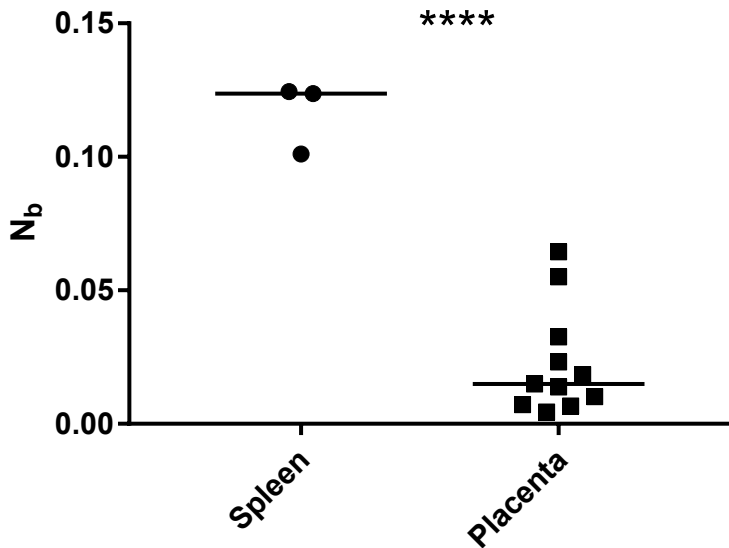

Supplement: zii999092570s1.pdf [file zii999092570s1.pdf]
